# Supplementary material
Source: PubMed Central journal article supplement (PMC5102060)
Supplement: NIHMS827407-supplement-Supplement.pdf [file NIHMS827407-supplement-Supplement.pdf]

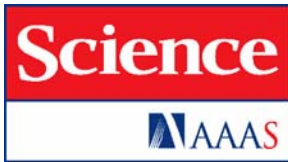

## Supporting Online Material for

### **Coat Color Variation at the Beginning of Horse Domestication**

Arne Ludwig,\* Melanie Pruvost, Monika Reissmann, Norbert Benecke, Gudrun A. Brockmann, Pedro Castaños, Michael Cieslak, Sebastian Lippold, Laura Llorente, Anna-Sapfo Malaspinas, Montgomery Slatkin, Michael Hofreiter\*

\*To whom correspondence should be addressed. E-mail: ludwig@izw-berlin.de (A.L.); hofreiter@eva.mpg.de (M.H.)

Published 24 April 2009, *Science* **324**, 485 (2009)

DOI: 10.1126/science.1172750

#### **This PDF file includes:**

Materials and Methods  
Figs. S1 to S3  
Tables S1 to S8  
References

## Supplementary online material

### Materials and Methods

#### Samples

Samples were obtained from Siberia, Middle and Eastern Europe, China and the Iberian Peninsula from different time points and cultural horizons (Table S1).

#### Ancient DNA Extraction and Amplification

DNA was extracted from 152 samples using between 250 mg and 400 mg bone material. External surfaces of bones were removed by abrasion to minimize environmental contaminations. Each sample was ground to powder with a freezer mill and incubated in 0.45 M EDTA (pH 8.0) and 0.25 mg/ml proteinase K overnight at room temperature under rotation. After centrifugation for 5 min at 4,000 rpm in a Universal 320 centrifuge (Hettich), DNA was purified from the supernatant using a silica based method as previously described (S1).

SNP amplifications were performed using multiplex PCR (S2, S3). PCR products for SNPs varied in length between 52 bp and 78 bp (including primers; see Table S3). Four microliters of extract were used for each multiplex PCR. The initial multiplex PCR was performed in a 20  $\mu$ l reaction volume containing 1x AmpliTaq Gold PCR buffer II (ABI), 4 mM MgCl<sub>2</sub>, 1 mg/ml Bovine Serum Albumin (BSA), 250  $\mu$ M of dATP, dCTP and dGTP, 500 $\mu$ M of dUTP, 150 nM of each primer and 2 U of AmpliTaq Gold (ABI). For each sample, one PCR was performed by adding 1 U of heat-labile Uracil-DNA Glycosylase (USB) and an initial incubation step of 15 min at 37 °C to control for carry-over contamination. PCR products were diluted 1/30 and 5  $\mu$ l (total reaction volume 20  $\mu$ l) were used for the next step. Singleplex PCRs contained 1x AmpliTaq Gold PCR Buffer II, 4 mM MgCl<sub>2</sub>, 1 mg/ml bovine serum albumin (BSA), 250  $\mu$ M of dATP, dCTP and dGTP, 500 $\mu$ M of dUTP, 1.5  $\mu$ M of each primer and 0.5 U of AmpliTaq Gold DNA polymerase. Both times, PCR was run under the following conditions: denaturation and Taq activation at 94 °C for 9 min; 30 up to 35 cycles at 95 °C 20 sec; annealing temperature depending on the primer pair (see Table S3) 30 sec; 72 °C 30 sec and final extension 4 min 72 °C. Negative extraction controls and negative PCR controls were used in each PCR. Amplification products were visualized on agarose gels.

#### Mutation analysis

Modern horses show a high variability in coat coloration. However, no color is confined to a single breed and the same mutation is responsible for a certain color variant across breeds, supporting the idea that mutations producing the color variants occurred prior to breed formation during the domestication process. Unfortunately, it is currently not possible to describe the coat color phenotype of ancient horses completely as until today not all genes associated with coat coloration were identified. Thus for some color phenotypes of interest (e.g. dun), there is as yet no genetic information available. We used a set of eight SNPs in six genes (Table S2) for detecting basic coat colors (bay, black and chestnut), two kinds of dilution (silver and cream) and three spotted or painted colorations (overo, tobiano and sabino). SNPs were chosen according to previous studies on modern horse populations (S4-S9); primers are listed in Table S3. Biotinylated PCR products were prepared at the PyroMark Vacuum Prep Workstation according to the manufacturer's instructions. Amplicons for each SNP were sequenced using

pyrosequencing TM technology on a PSQTM 96MA (Biotage). The SNPs were identified using PSQTM 96MA and automatically edited by the PSQTM 96MA SNP software. Due to the large deletion (11bp) of the mutated *non-black* allele (A) of *ASIP*, the risk to lose the mutated allele is relatively high for ancient DNA. For this reason, the number of replications (n=6) was increased in order to reduce the risk of false homozygote individuals below 1%. Additionally, allelic separation of *ASIP* was verified on page gels. The results for the color determination are summarized in Tables S4 and S5.

### **Allelic dropout**

The probability  $P$  of a false heterozygote individual is calculated after  $n$  replicates:  $P = K \times (K/2)^{n-1}$  where  $K$  is the observed number of allelic dropouts divided by all heterozygous individuals (*S10*). For all genes excepting *ASIP* we did a minimum of four replications which reduced the risk of non-detection of a heterozygote individual to an average of 0.3 % ( $P = 0.0078$  for *KIT13*, 0.0015 for *KIT16* and *MATP*, and 0.00012 for *MC1R*).

### **Estimating the allele frequency of missed alleles**

We computed the upper bound of the allele frequency of a coat color allele having been present in the pre-domestication population but not observed in our samples assuming a binomial sampling. Given  $n$  samples, we computed the maximum frequency  $f_{5\%}$  of a color allele in the population so that the probability of sampling none of them is above 5% (Table S7).

### **Estimation of selection coefficient**

We estimated the selection coefficient for each locus using Bollback et al.'s method (*S11*). This method has been developed to jointly estimate the selection coefficient and the effective population size from time-series data of allele frequencies. We binned the Siberian East/Central European and Chinese samples into five time periods with means about 13,100, 3,700, 2,800, 600 and 200 BC respectively. We assumed a generation time of five years. We used default values for all parameters of the program except for the grid size (Ngrid) of the allelic frequencies that was set to 2000. The likelihood was computed for selection coefficient ranging from -0.5 to 0.5 and effective population size ranging from 10,000 to 100,000. All the loci considered are assumed to be independent, in particular we considered only *SILV9* because *SILV11* seems to be in complete linkage disequilibrium with *SILV9*. See Figure S3 for the change in allelic frequency for each locus and Table S8 for the estimates of the selection parameter.

Note that, for our dataset, the maximum likelihood values are sensitive to the grid size but that the confidence intervals seem to be robust to this parameter. Therefore we used a bigger grid than the one suggested in (*S11*).

Like the above estimate of maximum allele frequencies of missed alleles, these analyses are limited by the available sample size. This is certainly also true for our sampling of color variations for early domesticated horses. Thus, it is possible that we missed extremely rare variants at a certain point in time. However, detection of additional color variants at the beginning of domestication would only strengthen our conclusions but not change the overall picture.

## Supplementary figures

**Figure S1:** Map of Eurasia showing the archaeological sites (black dots) from which the horse samples that were successfully analyzed for SNPs originate. The diagrams show the proportion of the different coat color phenotypes observed. Numbers show the total number of samples showing the indicated phenotype. From top to bottom: samples from the Pleistocene; the Neolithic/Copper Age; the Bronze Age; the Iron Age.

Late Pleistocene

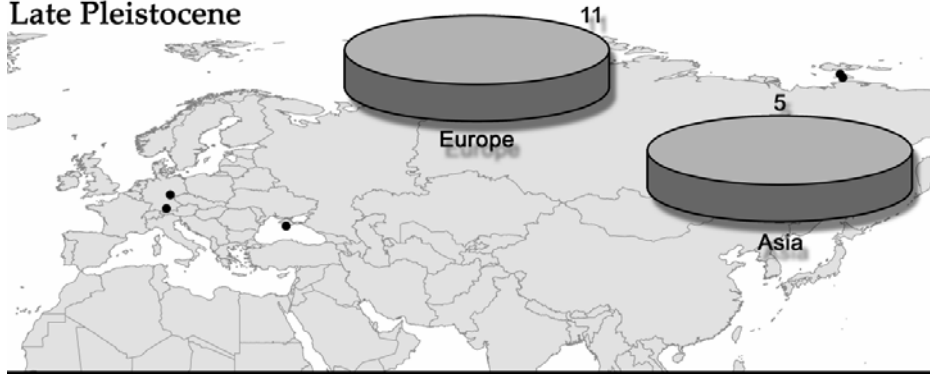

Neolithic / Copper Age

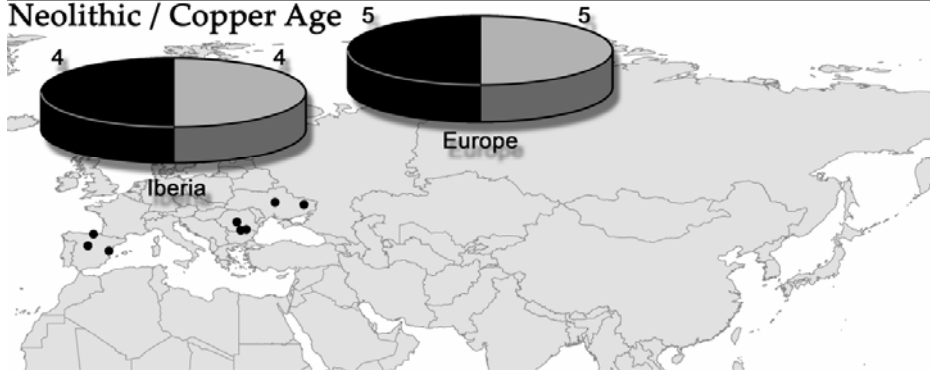

Bronze Age

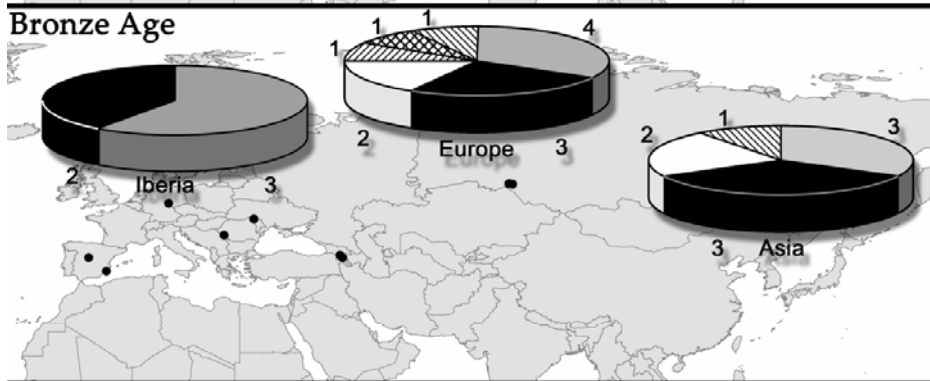

Iron Age / Medieval

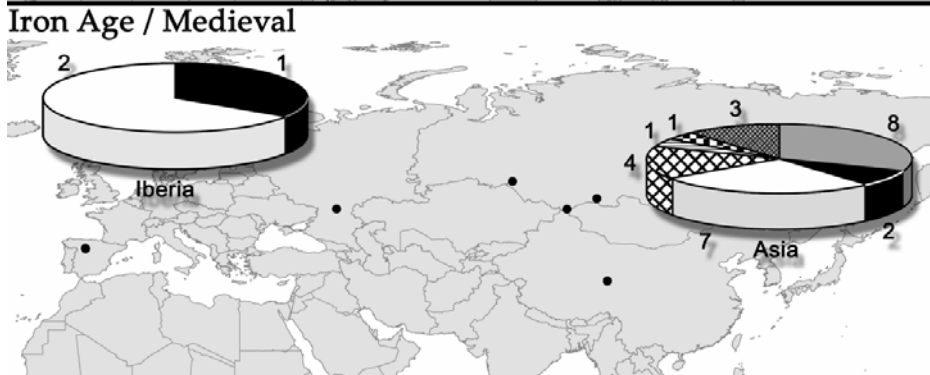

- |          |              |                  |
|----------|--------------|------------------|
| bay      | bay tobiano  | chestnut tobiano |
| black    | black silver | chestnut sabino  |
| chestnut | bay sabino   | buckskin         |

**Fig. S2:** Timeline for the first occurrence of the observed coat color phenotypes in Siberia, Europe and the Iberian Peninsula, respectively. Above the timescale, the timing of the first depictions of various horse-related implements is shown. Note that the timeline is interrupted between 12,000 and 5,000 BC.

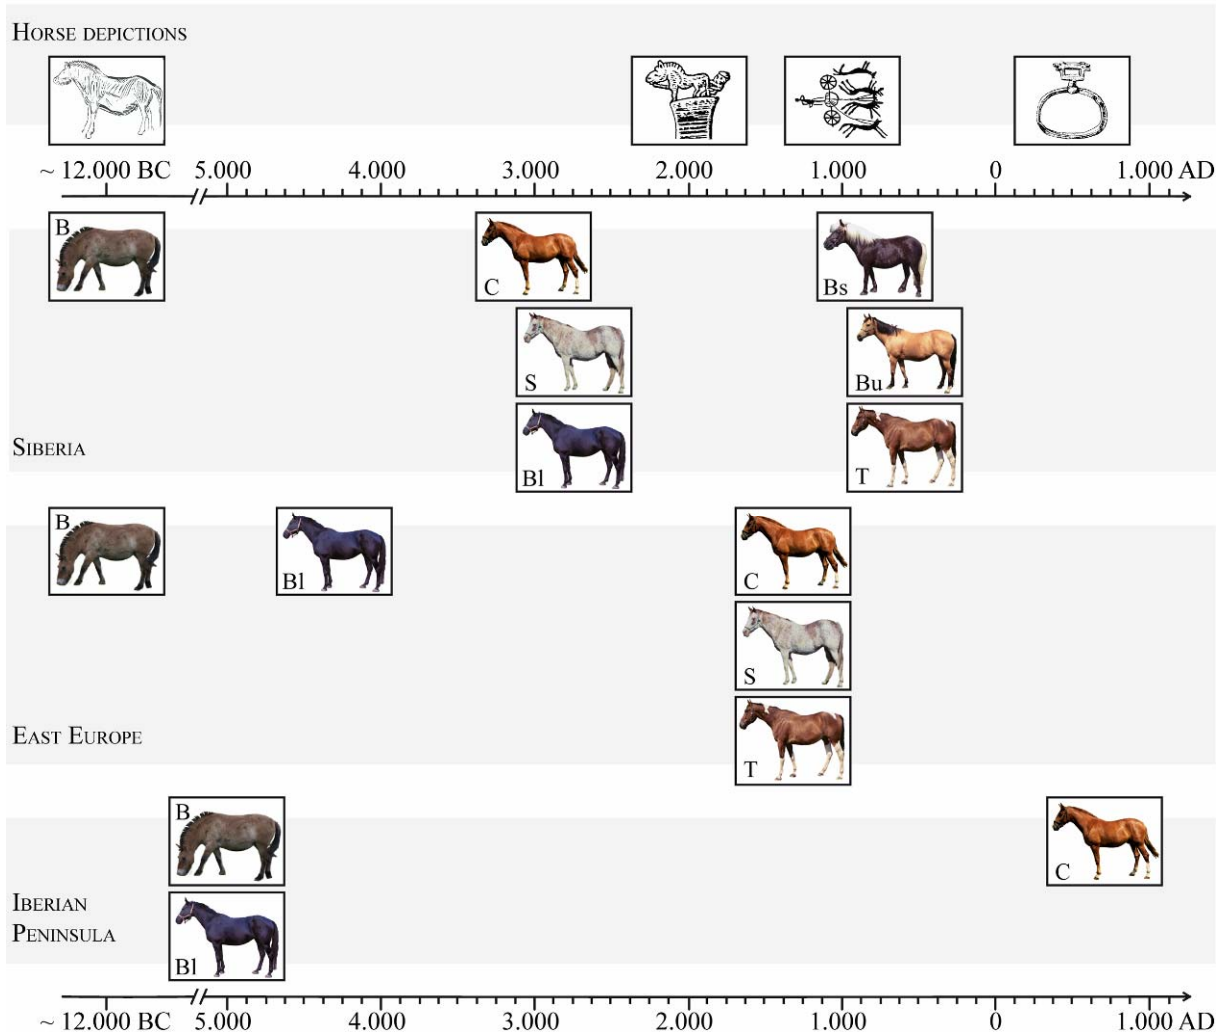

**Figure S3:** Change in allelic frequency for each locus. The number of chromosomes for each time point is 22, 20, 20, 36, 38 from left to right (see Table S5). The earliest Pleistocene samples were excluded. Note that for two genes (*ASIP* and *MC1R*), the allele frequencies change drastically.

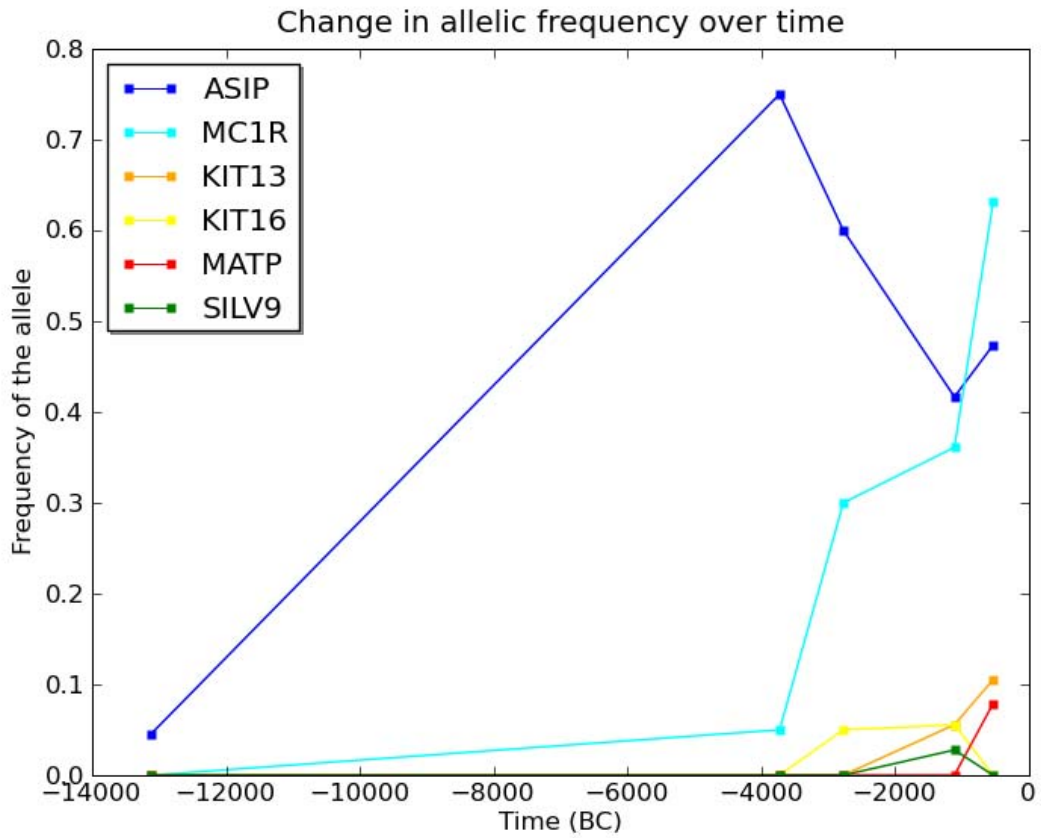

## Supplementary tables

**Table S1:** Samples analyzed for this study. The samples highlighted in grey are the samples that gave a complete and reproducible genotype for the coat coloration (Typing). The extraction and amplification of the samples (Ext/Amp) and the reproduction (Rep) were performed in two different institutes by Melanie Pruvost (MP) and Michael Cieslack (MC) at the Humboldt University in Berlin and Sebastian Lippold (SL) and Melanie Pruvost (MP) at the Max Planck Institute in Leipzig. The Pleistocene samples are not directly dated, but estimated from context should be around 20,000 years old. The remaining dates are either calibrated carbon dates or derived from archaeological context.

## Siberia

|                  | Sample  | Ext/Amp | Rep. | Det.   | Excavation                            | Geographical location | Date        | Typing |
|------------------|---------|---------|------|--------|---------------------------------------|-----------------------|-------------|--------|
| PLEISTOCENE      | SP1181A | MP/MP   |      | W(ild) | Maliy Lyakhovsky Isl.                 | North Siberia         | Pleistocene | Yes    |
|                  | SP1181B | MP/MP   |      | W      | Bol'shoy Lyakhovsky Isl.              | North Siberia         | Pleistocene | Yes    |
|                  | SP1181C | MP/MP   |      | W      | Bol'shoy Lyakhovsky Isl.              | North Siberia         | Pleistocene | Yes    |
|                  | SP1181D | MP/MP   |      | W      | Bol'shoy Lyakhovsky Isl.              | North Siberia         | Pleistocene | No     |
|                  | SP1181E | MP/MP   |      | W      | Oyagosskiy Yar, Kondrat'evo R., mouth | Siberia               | Pleistocene | Yes    |
|                  | SP1181F | MP/MP   |      | W      | Kotel'niy Isl., Anisiy Cape           | Siberia               | Pleistocene | Yes    |
| EARLY BRONZE AGE | BER 001 | MP/MP   |      | D(om)  | Denisova-Pescera                      | Siberia (Altai)       | 3000BC      | Yes    |
|                  | TAR 001 | MP/MP   | SL   | D      | Tartas1                               | West Siberia          | 2500-3000BC | Yes    |
|                  | TAR 002 | MP/MP   | SL   | D      | Tartas1                               | West Siberia          | 2500-3000BC | Yes    |
|                  | TAR 004 | MP/MP   |      | D      | Tartas1                               | West Siberia          | 2500-3000BC | Yes    |
|                  | TAR 005 | MP/MP   | SL   | D      | Tartas1                               | West Siberia          | 2500-3000BC | Yes    |
|                  | TAR 006 | MP/MP   |      | D      | Tartas1                               | West Siberia          | 2500-3000BC | No     |
|                  | TAR 007 | MP/MP   | SL   | D      | Tartas1                               | West Siberia          | 2500-3000BC | Yes    |
|                  | TAR 008 | MP/MP   |      | D      | Tartas1                               | West Siberia          | 2500-3000BC | Yes    |
|                  | TAR 009 | MP/MP   |      | D      | Tartas1                               | West Siberia          | 2500-3000BC | No     |
|                  | TAR 010 | MP/MP   |      | D      | Tartas1                               | West Siberia          | 2500-3000BC | Yes    |
|                  | TAR 011 | MP/MP   |      | D      | Tartas1                               | West Siberia          | 2500-3000BC | Yes    |
|                  | BAR 002 | MP/MP   |      | D      | Preobrazhenka--/2005                  | Siberia               | 2000-2500BC | No     |
| IRON AGE         | BER 002 | MP/MP   | SL   | D      | Om-1                                  | Siberia (Altai)       | 900BC       | Yes    |
|                  | Arz 1-2 | CW/MP   |      | D      | Arzan1                                | South Siberia (Tuva)  | 800BC       | Yes    |
|                  | Arz 1-3 | CW/MP   |      | D      | Arzan1                                | South Siberia (Tuva)  | 800BC       | Yes    |
|                  | Arz 2-1 | CW/MP   | MP   | D      | Arzan2                                | South Siberia (Tuva)  | 619-608 BC  | Yes    |
|                  | Arz 2-2 | CW/MP   | MP   | D      | Arzan2                                | South Siberia (Tuva)  | 619-608 BC  | Yes    |
|                  | Arz 2-3 | CW/MP   | MP   | D      | Arzan2                                | South Siberia (Tuva)  | 619-608 BC  | Yes    |
|                  | Arz 2-4 | CW/MP   | MP   | D      | Arzan2                                | South Siberia (Tuva)  | 619-608 BC  | Yes    |
|                  | Arz 2-5 | CW/MP   | MP   | D      | Arzan2                                | South Siberia (Tuva)  | 619-608 BC  | Yes    |
|                  | Arz 2-6 | CW/MP   | MP   | D      | Arzan2                                | South Siberia (Tuva)  | 619-608 BC  | Yes    |
|                  | Arz 2-7 | CW/MP   | MP   | D      | Arzan2                                | South Siberia (Tuva)  | 619-608 BC  | Yes    |
|                  | Arz 2-8 | CW/MP   | MP   | D      | Arzan2                                | South Siberia (Tuva)  | 619-608 BC  | Yes    |
| Arz 2-9          | CW/MP   | MP      | D    | Arzan2 | South Siberia (Tuva)                  | 619-608 BC            | Yes         |        |



|          |       |    |   |                   |                      |            |     |
|----------|-------|----|---|-------------------|----------------------|------------|-----|
| Arz 2-10 | CW/MP | MP | D | Arzan2            | South Siberia (Tuva) | 619-608 BC | Yes |
| Arz 2-11 | CW/MP | MP | D | Arzan2            | South Siberia (Tuva) | 619-608 BC | Yes |
| Arz 2-12 | CW/MP | MP | D | Arzan2            | South Siberia (Tuva) | 619-608 BC | Yes |
| Arz 2-13 | CW/MP | MP | D | Arzan2            | South Siberia (Tuva) | 619-608 BC | Yes |
| Arz 2-14 | CW/MP | MP | D | Arzan2            | South Siberia (Tuva) | 619-608 BC | Yes |
| Bars1A   | CW/MP |    | D | Barsucij Log      | South Siberia (Tuva) | 370-150 BC | Yes |
| Bars1B   | CW/MP |    | D | Barsucij Log      | South Siberia (Tuva) | 400-200 BC | Yes |
| OKG 001  | MP/MP |    | D | Olon-Kurin-Gol 10 | Siberia (Mongolia)   | 400-300 BC | Yes |
| OKG 002  | MP/MP |    | D | Olon-Kurin-Gol 10 | Siberia (Mongolia)   | 400-300 BC | Yes |
| OKG 003  | MP/MP | SL | D | Olon-Kurin-Gol 10 | Siberia (Mongolia)   | 400-300 BC | Yes |

### East European steppe

|                            | Sample | Ext/Amp | Rep. | Det.      | Excavation | Geographical location      | Date           | Typing |
|----------------------------|--------|---------|------|-----------|------------|----------------------------|----------------|--------|
| LATE GLACIATION-MESOLITHIC | PET1   | SL/MP   |      | W         | Petersfels | South Germany              | 14000-11000 BC | Yes    |
|                            | PET2   | SL/MP   |      | W         | Petersfels | South Germany              | 14000-11000 BC | Yes    |
|                            | PET3   | SL/MP   |      | W         | Petersfels | South Germany              | 14000-11000 BC | Yes    |
|                            | PET5   | SL/MP   | MP   | W         | Petersfels | South Germany              | 14000-11000 BC | Yes    |
|                            | PET6   | SL/MP   |      | W         | Petersfels | South Germany              | 14000-11000 BC | Yes    |
|                            | Kg1    | SL/MP   |      | W         | Kniegrotte | Germany (Thuringia)        | 15000-14000 BC | Yes    |
|                            | Kg2    | SL/MP   | MP   | W         | Kniegrotte | Germany (Thuringia)        | 15000-14000 BC | Yes    |
|                            | Kg3    | SL/MP   |      | W         | Kniegrotte | Germany (Thuringia)        | 15000-14000 BC | Yes    |
|                            | Kg4    | SL/MP   |      | W         | Kniegrotte | Germany (Thuringia)        | 15000-14000 BC | Yes    |
|                            | Kg5    | SL/MP   |      | W         | Kniegrotte | Germany (Thuringia)        | 15000-14000 BC | Yes    |
|                            | Spa 1  | CW/MP   | SL   | W         | Span-Koba  | Ukraine (Peninsula Crimea) | 9390-9210 BC   | Yes    |
| ENEOLITHIC                 | TRE1   | MP/MP   |      | W         | Trestiana  | Romania                    | 5700-5600 BC   | No     |
|                            | TRE2   | MP/MP   |      | W         | Trestiana  | Romania                    | 5700-5600 BC   | No     |
|                            | TRE3   | MP/MP   |      | W         | Trestiana  | Romania                    | 5700-5600 BC   | No     |
|                            | BUP1   | MP/MP   |      | W         | Bucsan Pod | Romania                    | 5500-5000 BC   | No     |
|                            | ISA1   | MP/MP   |      | W         | Isaia      | Romania                    | 5500 BC        | No     |
|                            | ISA2   | MP/MP   |      | W         | Isaia      | Romania                    | 5500 BC        | No     |
|                            | HAR1   | MP/MP   |      | W         | Harsova    | Romania                    | 5000-5500 BC   | No     |
|                            | HAR2   | MP/MP   |      | W         | Harsova    | Romania                    | 4500-2000 BC   | No     |
|                            | HAR3   | MP/MP   |      | W         | Harsova    | Romania                    | 4500-2000 BC   | No     |
|                            | Pie7   | MP/MP   |      | W         | Pietrele   | Romania                    | 4300 BC        | No     |
|                            | Pie9   | MP/MP   |      | W         | Pietrele   | Romania                    | 4300 BC        | Yes    |
|                            | Pie11  | MP/MP   |      | W         | Pietrele   | Romania                    | 4300 BC        | No     |
|                            | VIT1   | MP/MP   |      | W         | Vitanesti  | Romania                    | 4300-4220 BC   | No     |
|                            | VIT2   | MP/MP   |      | W         | Vitanesti  | Romania                    | 4350-4220 BC   | Yes    |
|                            | VIT3   | MP/MP   |      | W         | Vitanesti  | Romania                    | 4300-4220 BC   | No     |
| VIT4                       | MP/MP  |         | W    | Vitanesti | Romania    | 4360-4220 BC               | Yes            |        |
| ORL1                       | MP/MP  |         | W    | Orlovka   | Moldova    | 4000 BC                    | No             |        |

|            |       |       |    |                 |                 |               |              |     |
|------------|-------|-------|----|-----------------|-----------------|---------------|--------------|-----|
|            | ORL2  | MP/MP |    | W               | Orlovka         | Moldova       | 4000 BC      | No  |
|            | ORL3  | MP/MP |    | W               | Orlovka         | Moldova       | 4000 BC      | No  |
|            | ORL4  | MP/MP |    | W               | Orlovka         | Moldova       | 4000 BC      | No  |
| COPPER AGE | CAS1  | MP/MP |    | W               | Cascioarele     | Romania       | 3700-3380 BC | Yes |
|            | MAY1  | MP/MP |    | W               | Mayaki          | Ukraine       | 3600-3100 BC | No  |
|            | MAY2  | MP/MP |    | W               | Mayaki          | Ukraine       | 3600-3100 BC | No  |
|            | MAY3  | MP/MP |    | W               | Mayaki          | Ukraine       | 3640-3490 BC | Yes |
|            | MAY4  | MP/MP |    | W               | Mayaki          | Ukraine       | 3600-3100 BC | No  |
|            | MAY5  | MP/MP |    | W               | Mayaki          | Ukraine       | 3250-3100 BC | Yes |
|            | MAY6  | MP/MP |    | W               | Mayaki          | Ukraine       | 3520-3330 BC | Yes |
|            | MAY7  | MP/MP |    | W               | Mayaki          | Ukraine       | 3520-3380 BC | Yes |
|            | MAY8  | MP/MP |    | W               | Mayaki          | Ukraine       | 3600-3100 BC | No  |
|            | MAY9  | MP/MP |    | W               | Mayaki          | Ukraine       | 3600-3100 BC | No  |
|            | MAY10 | MP/MP |    | W               | Mayaki          | Ukraine       | 3650-3500 BC | Yes |
|            | MOL5  | MP/MP |    | W?              | Molyukhov Bugor | Ukraine       | 3720-3630 BC | Yes |
|            | MOL7  | MP/MP |    | W?              | Molyukhov Bugor | Ukraine       | 3720-3630 BC | No  |
| MOL8       | MP/MP |       | W? | Molyukhov Bugor | Ukraine         | 3720-3630 BC  | No           |     |
| BRONZE AGE | GRO8  | MP/MP |    | D               | Großobringen    | Germany       | 3000-2500 BC | No  |
|            | GRO9  | MP/MP |    | D               | Großobringen    | Germany       | 3000-2500 BC | No  |
|            | GRO10 | MP/MP |    | D               | Großobringen    | Germany       | 3000-2500 BC | No  |
|            | GRO11 | MP/MP |    | D               | Großobringen    | Germany       | 3000-2500 BC | Yes |
|            | Gar1  | MP/MP |    | D               | Garbovat        | Romania       | 1500-1000 BC | No  |
|            | Gar2  | MP/MP |    | D               | Garbovat        | Romania       | 1500-1000 BC | Yes |
|            | Gar3  | MP/MP |    | D               | Garbovat        | Romania       | 1500-1000 BC | Yes |
|            | Gar4  | MP/MP |    | D               | Garbovat        | Romania       | 1500-1000 BC | Yes |
|            | Bar1  | MP/MP |    | D               | Garbovat        | Romania       | 1500-1000 BC | No  |
|            | Bar3  | MP/MP |    | D               | Garbovat        | Romania       | 1500-1000 BC | No  |
|            | Lch 1 | CW/MP |    | D               | Lchashen        | Armenia       | 1410-1250 BC | Yes |
|            | Lor 1 | CW/MP |    | D               | Lori-Berd       | North Armenia | 1950-1750 BC | Yes |
|            | Mic1  | MP/MP |    | D               | Miciurin        | Moldova       | 1500-1000 BC | Yes |
|            | Mic2  | MP/MP |    | D               | Miciurin        | Moldova       | 1500-1000 BC | Yes |
|            | Mic3  | MP/MP |    | D               | Miciurin        | Moldova       | 1500-1000 BC | Yes |
|            | Mic4  | MP/MP |    | D               | Miciurin        | Moldova       | 1500-1000 BC | Yes |
|            | Mic5  | MP/MP |    | D               | Miciurin        | Moldova       | 1500-1000 BC | Yes |
| Shi 1      | CW/MP | SL    | D  | Shirakavan      | Armenia         | 895-795 BC    | Yes          |     |

## China

|          | Sample | Ext/Amp | Rep. | Det. | Excavation | Geographical location | Date        | Typing |
|----------|--------|---------|------|------|------------|-----------------------|-------------|--------|
| IRON AGE | Fen 1  | CW/MP   |      | D    | Fengtai    | China (Qinghai)       | 905-800 BC  | Yes    |
|          | Fen 2  | CW/MP   |      | D    | Fengtai    | China (Qinghai)       | 1000-800 BC | Yes    |

|       |       |  |   |         |                 |             |     |
|-------|-------|--|---|---------|-----------------|-------------|-----|
| Fen 3 | CW/MP |  | D | Fengtai | China (Qinghai) | 1000-800 BC | Yes |
| Fen 4 | CW/MP |  | D | Fengtai | China (Qinghai) | 1000-800 BC | Yes |

## Spain

|                      | Sample     | Extraction | Rep.  | Det.                     | Excavation                      | Geographical location     | Date                      | Typing       |
|----------------------|------------|------------|-------|--------------------------|---------------------------------|---------------------------|---------------------------|--------------|
| MESOLITHIC-NEOLITHIC | 41         | MC/MC      | SL    | W                        | Atxoste                         | Iberian Peninsula (Spain) | 5500-4950 BC              | No           |
|                      | 42         | MC/MC      | SL    | W                        | Atxoste                         | Iberian Peninsula (Spain) | 5500-4950 BC              | No           |
|                      | 43         | MC/MC      | SL    | W                        | Atxoste                         | Iberian Peninsula (Spain) | 5500-4950 BC              | No           |
|                      | 44         | MC/MC      | SL    | W                        | Atxoste                         | Iberian Peninsula (Spain) | 5500-4950 BC              | Yes          |
|                      | 45         | MC/MC      | SL    | W                        | Atxoste                         | Iberian Peninsula (Spain) | 5500-4950 BC              | Yes          |
|                      | 1          | MC/MC      |       | W                        | Cueva Fosca -Valencia-Cartellon | Iberian Peninsula (Spain) | 5200 -4900BC              | No           |
|                      | 2          | MC/MC      |       | W                        | Cueva Fosca -Valencia-Cartellon | Iberian Peninsula (Spain) | 5200 -4900BC              | No           |
|                      | 3          | MC/MC      |       | W                        | Cueva Fosca -Valencia-Cartellon | Iberian Peninsula (Spain) | 5200-4900 BC              | Yes          |
|                      | 31         | MC/MC      |       | W                        | Cueva Fosca -Valencia-Cartellon | Iberian Peninsula (Spain) | 5210-4910 BC              | Yes          |
|                      | 32         | MC/MC      |       | W                        | Cueva Fosca -Valencia-Cartellon | Iberian Peninsula (Spain) | 5220-4980 BC              | Yes          |
|                      | 33         | MC/MC      |       | W                        | Cueva Fosca -Valencia-Cartellon | Iberian Peninsula (Spain) | 5220-4900 BC              | No           |
|                      | 34         | MC/MC      |       | W                        | Cueva Fosca -Valencia-Cartellon | Iberian Peninsula (Spain) | 5220-4900 BC              | Yes          |
|                      | 35         | MC/MC      |       | W                        | Cueva Fosca -Valencia-Cartellon | Iberian Peninsula (Spain) | 5380-5210BC               | No           |
|                      | 36         | MC/MC      |       | W                        | Cueva Fosca -Valencia-Cartellon | Iberian Peninsula (Spain) | 5070-4840BC               | No           |
|                      | 37         | MC/MC      |       | W                        | Cueva Fosca -Valencia-Cartellon | Iberian Peninsula (Spain) | 5210-4910 BC              | Yes          |
|                      | 17         | MC/MC      | SL    | W                        | Cueva De La Vaquera-Segovia     | Iberian Peninsula (Spain) | 5210-4940 BC              | Yes          |
|                      | COPPER AGE | 27         | MC/MC |                          | D                               | El Caprichio-Madrid       | Iberian Peninsula (Spain) | 4300-2200 BC |
| 28                   |            | MC/MC      |       | D                        | Carmona-Sevilla/Andalusia       | Iberian Peninsula (Spain) | 4300-2200 BC              | No           |
| 19                   |            | MC/MC      | SL    | D                        | Las Pozas -Zamora               | Iberian Peninsula (Spain) | 4300 -2200 BC             | No           |
| 20                   |            | MC/MC      | SL    | D                        | Cueva Rubia-Valmayor/Madrid     | Iberian Peninsula (Spain) | 2880-2570 BC              | No           |
| 21                   |            | MC/MC      | SL    | D                        | Cueva Rubia-Valmayor/Madrid     | Iberian Peninsula (Spain) | 2900- 2500 BC             | No           |
| BRONZE AGE           | 22         | MC/MC      | SL    | D                        | Cueva Rubia-Valmayor/Madrid     | Iberian Peninsula (Spain) | 1350 BC                   | Yes          |
|                      | 23         | MC/MC      |       | D                        | Cueva Rubia-Valmayor/Madrid     | Iberian Peninsula (Spain) | 1350 BC                   | No           |
|                      | 24         | MC/MC      |       | D                        | Cueva Rubia-Valmayor/Madrid     | Iberian Peninsula (Spain) | 1350 BC                   | Yes          |
|                      | 25         | MC/MC      |       | D                        | Cueva Rubia-Valmayor/Madrid     | Iberian Peninsula (Spain) | 1350 BC                   | Yes          |
|                      | 26         | MC/MC      |       | D                        | Cueva Rubia-Valmayor/Madrid     | Iberian Peninsula (Spain) | 1350 BC                   | No           |
|                      | 38         | MC/MC      |       | D                        | El Acequion                     | Iberian Peninsula (Spain) | 2200-800 BC               | No           |
|                      | 39         | MC/MC      |       | D                        | El Acequion                     | Iberian Peninsula (Spain) | 2200-800 BC               | Yes          |
|                      | 40         | MC/MC      |       | D                        | El Acequion                     | Iberian Peninsula (Spain) | 2200-800 BC               | Yes          |
|                      | 8          | MC/MC      | SL    | D                        | Peñalosa-Jaén -Andalucia        | Iberian Peninsula (Spain) | 2200 - 800 BC             | No           |
|                      | 9          | MC/MC      | SL    | D                        | Peñalosa-Jaén -Andalucia        | Iberian Peninsula (Spain) | 2200 - 800 BC             | No           |
|                      | 10         | MC/MC      | SL    | D                        | Peñalosa-Jaén -Andalucia        | Iberian Peninsula (Spain) | 2200 - 800 BC             | No           |
| 11                   | MC/MC      | SL         | D     | Peñalosa-Jaén -Andalucia | Iberian Peninsula (Spain)       | 2200 - 800 BC             | No                        |              |
| 12                   | MC/MC      | SL         | D     | Peñalosa-Jaén -Andalucia | Iberian Peninsula (Spain)       | 2200 - 800 BC             | No                        |              |
| 13                   | MC/MC      | SL         | D     | Peñalosa-Jaén -Andalucia | Iberian Peninsula (Spain)       | 2200 - 800 BC             | No                        |              |

|               |    |       |    |    |                               |                           |               |     |
|---------------|----|-------|----|----|-------------------------------|---------------------------|---------------|-----|
|               | 14 | MC/MC | SL | D  | Peñalosa-Jaén -Andalucia      | Iberian Peninsula (Spain) | 2200 - 800 BC | No  |
|               | 15 | MC/MC | SL | D  | Peñalosa-Jaén -Andalucia      | Iberian Peninsula (Spain) | 2200 - 800 BC | No  |
|               | 18 | MC/MC | SL | D  | Morra Del Quintanar- Albacete | Iberian Peninsula (Spain) | 2200 - 800 BC | No  |
| IRON AGE      | 16 | MC/MC | SL | D  | La Mota -Medina Del Campo     | Iberian Peninsula (Spain) | 800 BC - 6 AD | No  |
|               | 4  | MC/MC | SL | W? | Soto de Medinilla -Valladolid | Iberian Peninsula (Spain) | 800 BC - 6 AD | Yes |
|               | 5  | MC/MC | SL | W? | Soto de Medinilla -Valladolid | Iberian Peninsula (Spain) | 800 BC - 6 AD | No  |
|               | 6  | MC/MC | SL | W? | Soto de Medinilla -Valladolid | Iberian Peninsula (Spain) | 800 BC - 6 AD | No  |
|               | 7  | MC/MC | SL | W? | Soto de Medinilla -Valladolid | Iberian Peninsula (Spain) | 800 BC - 6 AD | No  |
| MEDI EV<br>AL | 29 | MC/MC |    | D  | Mucientes-Valladolid          | Iberian Peninsula (Spain) | 660-780 AD    | Yes |
|               | 30 | MC/MC |    | D  | Mucientes-Valladolid          | Iberian Peninsula (Spain) | 680-890 AD    | Yes |

**Table S2.** Genes associated with coat color variation typed in this study. Shown are gene name, GenBank accession number, position and type of mutation, the associated color of both the wildtype and the derived state and the reference in which the mutation was first described.

| Gene                              | AccNo    | Mutation       | Associated color                                                           | Reference |
|-----------------------------------|----------|----------------|----------------------------------------------------------------------------|-----------|
| <i>MC1R</i>                       | X98012   | g.201C>T       | C: non-chestnut ( <i>E</i> )<br>T: chestnut ( <i>e</i> )                   | S8        |
| <i>ASIP</i>                       | AF288358 | g.2183_2193del | -: non-black ( <i>A</i> )<br>Deletion 11 bp: black ( <i>a</i> )            | S9        |
| <i>MATP</i><br>( <i>SLC45A2</i> ) | AY187093 | g.72G>A        | G: non-cream ( <i>C</i> )<br>A: cream ( <i>cr</i> )                        | S7        |
| <i>KIT</i>                        | AY048669 | g.786G>C       | G: tobiano pattern ( <i>KMI</i> )<br>C: non-tobiano pattern ( <i>KM0</i> ) | S5        |
|                                   | AY874542 | g.1120T>A      | T: non-sabino spotted ( <i>sb1</i> )<br>A: sabino spotted ( <i>SBI</i> )   | S4        |
| <i>SILV</i>                       | DQ665301 | g.1457C>T      | C: non-silver<br>T: silver                                                 | S12       |
|                                   |          | g.697A>T       | A: non-silver, linked with<br>g.1457C<br>T: silver, coupled with g.1457T   |           |
| <i>EDNRB</i>                      | AF038900 | c.323_333TC>AG | TC: non-overo pattern<br>AG: overo pattern                                 | S13       |

**Table S3:** Primers used for the coat color SNPs amplification. An annealing temperature of 57 °C was used for all of the primer pairs.

| Gene         | Name          | Sequence 5' to 3'               | bp | Modif.    | Length |
|--------------|---------------|---------------------------------|----|-----------|--------|
| <i>KIT</i>   | Pk-KIT-I13 F  | CGT CAT GAC TCA TTC GTG AGA A   | 22 |           | 63 bp  |
|              | Pk-KIT-I13 R  | GCT CTG AAG GTA ACA AGC AAC TAA | 24 | 5'-Biotin |        |
|              | Pk-KIT-I13 S  | TGA GAA ATT TCC GCC             | 15 |           |        |
| <i>EDNRB</i> | P-EDNRB-E1 F  | CAG TAG TGT CCT GCC TAG TGT TCG | 24 | 5'-Biotin | 63bp   |
|              | P-EDNRB-E1 S  | TCA GCA GTG TGG AGT TT          | 17 |           |        |
|              | Pk-EDNRB-E1 R | TGA TTC TCA GCA GTG TGG AGT TT  | 23 |           |        |
| <i>KIT</i>   | Pk-KIT-I16 F  | TTT AAA TGG CTT TCT TTT CTC C   | 22 | 5'-Biotin | 59 bp  |
|              | Pk-KIT-I16 R  | TGC CAA GTC CCT ATG AAT ACA C   | 22 |           |        |
|              | Pk-KIT-I16 S  | CTA TGA ATA CAC TAT TAG GA      | 20 |           |        |
| <i>MATP</i>  | P-MATP-E2F    | GCC ATA ACC ATC ACC ATG ATA G   | 22 | 5'-Biotin | 65bp   |
|              | Pk-MATP-E2 R  | GGC CCA TCA ATG AAG TCA G       | 19 |           |        |
|              | P-MATP-E2 S   | GAA GTC AGC AGC AAA A           | 16 |           |        |
| <i>MC1R</i>  | Pk-MC1R-E1 F  | GCA CTC ACC CAT GTA CTA CTT CAT | 24 |           | 71 bp  |
|              | Pk-MC1R-E1 R  | GCA CGT TGC TCA TGC TCA C       | 19 | 5'-Biotin |        |
|              | P-MC1R-E1 S   | CTG CTG CCT GGC CGT             | 15 |           |        |
| <i>SILV</i>  | Pk-SILV-E11 F | TCC TTC TTC TTC TCC CAA ATC A   | 22 | 5'-Biotin | 52 bp  |
|              | P-SILV-E11 R  | GAG CTG AGC CCT GCT TCA TAA     | 21 |           |        |
|              | P-SILV-E11 S  | GCC CTG CTT CAT AAG TC          | 17 |           |        |
| <i>SILV</i>  | Pk-SILV-I9 F  | AGG ATG AAG GGG AGT GGG         | 18 |           | 62 bp  |
|              | Pk-SILV-I9 R  | GGC ACA GCT TCA GTC AGT GTC T   | 22 | 5'-Biotin |        |

|             |              |                               |    |           |          |
|-------------|--------------|-------------------------------|----|-----------|----------|
|             | Pk-SILV-I9 S | GGG GAG TGG GCA GAG           | 15 |           |          |
| <i>ASIP</i> | Pk-ASIP-E2 F | CAA GAA ATC CAA AAA GAT CAG C | 22 | 5'-Biotin | 67/78 bp |
|             | Pk-ASIP-E2 R | ATG AGA AGT CCA AGG CCT ACC T | 22 |           |          |
|             | P-ASIP-E2 S  | CCT ACC TTG GAA GAT CTC       | 18 |           |          |

**Table S4.** Sample information for the horse fossils successfully typed for the coat color SNPs. The table contains information on geographic location, excavation, dating, and color phenotype of the samples. Grey shaded dates indicate samples directly dated by radiocarbon dating (see also Table S6). All radiocarbon ages are given in calibrated years (cal.). The Late Pleistocene samples were estimated at around 20,000 years based on context.

| <b>Siberia</b> |                  |                    |                      |                                        |                  |                     |
|----------------|------------------|--------------------|----------------------|----------------------------------------|------------------|---------------------|
|                | <b>Sample</b>    | <b>Designation</b> | <b>Location</b>      | <b>Excavation</b>                      | <b>Date</b>      | <b>Phenotype</b>    |
| PLEISTOCENE    | SP1181A          | W(ild)             | North Siberia        | Maliy Lyakhovsky Isl.                  | Late Pleistocene | <b>Bay</b>          |
|                | SP1181B          | W                  | North Siberia        | Bol'shoy Lyakhovsky Isl.               | Late Pleistocene | <b>Bay</b>          |
|                | SP1181C          | W                  | North Siberia        | Bol'shoy Lyakhovsky Isl.               | Late Pleistocene | <b>Bay</b>          |
|                | SP1181E          | W                  | Siberia              | Oyagoskiy Yar, Kondrat'evy River mouth | Late Pleistocene | <b>Bay</b>          |
|                | SP1181F          | W                  | Siberia              | Kotel'niy Isl., Anisiy Cape            | Late Pleistocene | <b>Bay</b>          |
|                | EARLY BRONZE AGE | BER 001            | D(omestic)           | Siberia (Altai)                        | Denisova-Pescera | 3000BC              |
| TAR 001        |                  | D                  | West Siberia         | Tartas1                                | 2500-3000BC      | <b>Bay</b>          |
| TAR 002        |                  | D                  | West Siberia         | Tartas1                                | 2500-3000BC      | <b>Chestnut</b>     |
| TAR 004        |                  | D                  | West Siberia         | Tartas1                                | 2500-3000BC      | <b>Bay</b>          |
| TAR 005        |                  | D                  | West Siberia         | Tartas1                                | 2500-3000BC      | <b>Bay Sabino</b>   |
| TAR 007        |                  | D                  | West Siberia         | Tartas1                                | 2500-3000BC      | <b>Black</b>        |
| TAR 008        |                  | D                  | West Siberia         | Tartas1                                | 2500-3000BC      | <b>Bay</b>          |
| TAR 010        |                  | D                  | West Siberia         | Tartas1                                | 2500-3000BC      | <b>Black</b>        |
| TAR 011        |                  | D                  | West Siberia         | Tartas1                                | 2500-3000BC      | <b>Black</b>        |
| IRON AGE       |                  | BER 002            | D                    | Siberia (Altai)                        | Om-1             | 900BC               |
|                | Arz 1-2          | D                  | South Siberia (Tuva) | Arzan1                                 | 800BC            | <b>Chestnut</b>     |
|                | Arz 1-3          | D                  | South Siberia (Tuva) | Arzan1                                 | 800BC            | <b>Black Silver</b> |
|                | Arz 2-1          | D                  | South Siberia (Tuva) | Arzan2                                 | 619-608 BC       | <b>Bay</b>          |
|                | Arz 2-2          | D                  | South Siberia (Tuva) | Arzan2                                 | 619-608 BC       | <b>Black</b>        |
|                | Arz 2-3          | D                  | South Siberia (Tuva) | Arzan2                                 | 619-608 BC       | <b>Chestnut</b>     |
|                | Arz 2-4          | D                  | South Siberia (Tuva) | Arzan2                                 | 619-608 BC       | <b>Bay</b>          |
|                | Arz 2-5          | D                  | South Siberia (Tuva) | Arzan2                                 | 619-608 BC       | <b>Chestnut</b>     |
|                | Arz 2-6          | D                  | South Siberia (Tuva) | Arzan2                                 | 619-608 BC       | <b>Bay</b>          |
|                | Arz 2-7          | D                  | South Siberia (Tuva) | Arzan2                                 | 619-608 BC       | <b>Black</b>        |

|          |   |                      |                   |                 |                     |
|----------|---|----------------------|-------------------|-----------------|---------------------|
| Arz 2-8  | D | South Siberia (Tuva) | Arzan2            | 619-608 BC      | Buckskin            |
| Arz 2-9  | D | South Siberia (Tuva) | Arzan2            | 619-608 BC      | Buckskin            |
| Arz 2-10 | D | South Siberia (Tuva) | Arzan2            | 619-608 BC      | Chestnut<br>Tobiano |
| Arz 2-11 | D | South Siberia (Tuva) | Arzan2            | 619-608 BC      | Chestnut            |
| Arz 2-12 | D | South Siberia (Tuva) | Arzan2            | 619-608 BC      | Chestnut            |
| Arz 2-13 | D | South Siberia (Tuva) | Arzan2            | 619-608 BC      | Chestnut            |
| Arz 2-14 | D | South Siberia (Tuva) | Arzan2            | 619-608 BC      | Bay                 |
| Bars1A   | D | South Siberia (Tuva) | Barsucij Log      | cal. 370-150 BC | Bay Tobiano         |
| Bars1B   | D | South Siberia (Tuva) | Barsucij Log      | cal. 400-200 BC | Bay Tobiano         |
| OKG 001  | D | Siberia (Mongolia)   | Olon-Kurin-Gol 10 | 400-300 BC      | Chestnut            |
| OKG 002  | D | Siberia (Mongolia)   | Olon-Kurin-Gol 10 | 400-300 BC      | Bay Tobiano         |
| OKG 003  | D | Siberia (Mongolia)   | Olon-Kurin-Gol 10 | 400-300 BC      | Buckskin            |

### Eastern Europe

|                            |       |   |                               |            |                   |     |
|----------------------------|-------|---|-------------------------------|------------|-------------------|-----|
| GLACIATION -<br>MESOLITHIC | PET1  | W | South Germany                 | Petersfels | 14000-11000 BC    | Bay |
|                            | PET2  | W | South Germany                 | Petersfels | 14000-11000 BC    | Bay |
|                            | PET3  | W | South Germany                 | Petersfels | 14000-11000 BC    | Bay |
|                            | PET5  | W | South Germany                 | Petersfels | 14000-11000 BC    | Bay |
|                            | PET6  | W | South Germany                 | Petersfels | 14000-11000 BC    | Bay |
|                            | Kg1   | W | Germany (Thuringia)           | Kniegrotte | 15000-14000 BC    | Bay |
|                            | Kg2   | W | Germany (Thuringia)           | Kniegrotte | 15000-14000 BC    | Bay |
|                            | Kg3   | W | Germany (Thuringia)           | Kniegrotte | 15000-14000 BC    | Bay |
|                            | Kg4   | W | Germany (Thuringia)           | Kniegrotte | 15000-14000 BC    | Bay |
|                            | Kg5   | W | Germany (Thuringia)           | Kniegrotte | 15000-14000 BC    | Bay |
|                            | Spa 1 | W | Ukraine (Peninsula<br>Crimea) | Span-Koba  | cal. 9390-9210 BC | Bay |



|                       |       |    |                 |                 |                   |                        |
|-----------------------|-------|----|-----------------|-----------------|-------------------|------------------------|
| ENEOLITHIC-COPPER AGE | Pie9  | W  | Romania         | Pietrele        | 4300 BC           | <b>Black</b>           |
|                       | CAS1  | W  | Romania         | Cascioarele     | cal. 3700-3380 BC | <b>Black</b>           |
|                       | VIT2  | W  | Romania         | Vitanesti       | cal. 4350-4220 BC | <b>Black</b>           |
|                       | VIT4  | W  | Romania         | Vitanesti       | cal. 4360-4220 BC | <b>Black</b>           |
|                       | MAY3  | W  | Ukraine         | Mayaki          | cal. 3640-3490 BC | <b>Bay</b>             |
|                       | MAY5  | W  | Ukraine         | Mayaki          | cal. 3250-3100 BC | <b>Bay</b>             |
|                       | MAY6  | W  | Ukraine         | Mayaki          | cal. 3520-3330 BC | <b>Bay</b>             |
|                       | MAY7  | W  | Ukraine         | Mayaki          | cal. 3520-3380 BC | <b>Bay</b>             |
|                       | MAY10 | W  | Ukraine         | Mayaki          | cal. 3650-3500 BC | <b>Bay</b>             |
|                       | MOL5  | W? | Ukraine         | Molyukhov Bugor | cal. 3720-3630 BC | <b>Black</b>           |
| BRONZE AGE            | Gar2  | D  | Romania         | Garbovat        | 1500-1000 BC      | <b>Black</b>           |
|                       | Gar3  | D  | Romania         | Garbovat        | 1500-1000 BC      | <b>Bay</b>             |
|                       | Gar4  | D  | Romania         | Garbovat        | 1500-1000 BC      | <b>Bay</b>             |
|                       | GRO11 | D  | Germany         | Großobringen    | 3000-2500 BC      | <b>Black</b>           |
|                       | Shi 1 | D  | Armenia         | Shirakavan      | cal. 895-795 BC   | <b>Chestnut</b>        |
|                       | Lch 1 | D  | Armenia         | Lchashen        | cal. 1410-1250 BC | <b>Chestnut Sabino</b> |
|                       | Lor 1 | D  | North Armenia   | Lori-Berd       | cal. 1950-1750 BC | <b>Bay</b>             |
|                       | Mic1  | D  | Moldova         | Miciurin        | 1500-1000 BC      | <b>Bay Tobiano</b>     |
|                       | Mic2  | D  | Moldova         | Miciurin        | 1500-1000 BC      | <b>Chestnut</b>        |
|                       | Mic3  | D  | Moldova         | Miciurin        | 1500-1000 BC      | <b>Black</b>           |
|                       | Mic4  | D  | Moldova         | Miciurin        | 1500-1000 BC      | <b>Bay</b>             |
|                       | Mic5  | D  | Moldova         | Miciurin        | 1500-1000 BC      | <b>Bay Sabino</b>      |
| <b>China</b>          |       |    |                 |                 |                   |                        |
| IRON AGE              | Fen 1 | D  | China (Qinghai) | Fengtai         | cal. 905-800 BC   | <b>Bay Tobiano</b>     |
|                       | Fen 2 | D  | China (Qinghai) | Fengtai         | cal. 1000-800 BC  | <b>Bay</b>             |
|                       | Fen 3 | D  | China (Qinghai) | Fengtai         | cal. 1000-800 BC  | <b>Bay</b>             |

|                          | Fen 4 | D  | China (Qinghai) | Fengtai                          | cal. 1000-800 BC  | Bay      |
|--------------------------|-------|----|-----------------|----------------------------------|-------------------|----------|
| <b>Iberian Peninsula</b> |       |    |                 |                                  |                   |          |
| MESOLITHIC-<br>NEOLITHIC | 44    | W  | Spain           | Atxoste                          | 5500- 4950 BC     | Bay      |
|                          | 45    | W  | Spain           | Atxoste                          | 5500- 4950 BC     | Bay      |
|                          | 3     | W  | Spain           | Cueva Fosca - Valencia-Cartellon | cal. 5200-4900 BC | Black    |
|                          | 31    | W  | Spain           | Cueva Fosca - Valencia-Cartellon | cal. 5210-4910 BC | Bay      |
|                          | 32    | W  | Spain           | Cueva Fosca - Valencia-Cartellon | cal. 5220-4980 BC | Black    |
|                          | 34    | W  | Spain           | Cueva Fosca - Valencia-Cartellon | cal. 5220-4900 BC | Black    |
|                          | 37    | W  | Spain           | Cueva Fosca - Valencia-Cartellon | cal. 5210-4910 BC | Bay      |
|                          | 17    | W  | Spain           | Cueva De La Vaquera - Segovia    | cal. 5210-4940 BC | Black    |
| BRONZE<br>AGE            | 39    | D  | Spain           | El Acequion                      | 2200 BC - 800 AD  | Bay      |
|                          | 40    | D  | Spain           | El Acequion                      | 2200 BC - 800 AD  | Bay      |
|                          | 24    | D  | Spain           | Cueva Rubia - Valmayor/Madrid    | 1350 BC           | Bay      |
|                          | 22    | D  | Spain           | Cueva Rubia - Valmayor/Madrid    | 1350 BC           | Black    |
|                          | 25    | D  | Spain           | Cueva Rubia - Valmayor/Madrid    | 1350 BC           | Black    |
| IRON AGE                 | 4     | W? | Spain           | Soto de Medinilla - Valladolid   | 800 BC - 6 AD     | Black    |
| MEDIEVAL                 | 29    | D  | Spain           | Mucientes - Valladolid           | cal. 660-780 AD   | Chestnut |
|                          | 30    | D  | Spain           | Mucientes - Valladolid           | cal. 680-890AD    | Chestnut |

**Table S5.** Results for SNP typing. In addition to the phenotype, the genotypes for all eight SNPs investigated are shown. Grey shading indicates that at least one allele differs from the wildtype. We did not detect any variation at the *EDNRB* locus.

| Siberia          | Sample  | Designation | Phenotype    | nuclear Genes |              |              |              |             |             |              |               |
|------------------|---------|-------------|--------------|---------------|--------------|--------------|--------------|-------------|-------------|--------------|---------------|
|                  |         |             |              | <i>ASIP</i>   | <i>EDNRB</i> | <i>KIT13</i> | <i>KIT16</i> | <i>MATP</i> | <i>MC1R</i> | <i>SILV9</i> | <i>SILV11</i> |
| PLEISTOCENE      | SP1181A | W(ild)      | Bay          | A/A           | ov/ov        | KM0/KM0      | sb1/sb1      | C/C         | E/E         | z/z          | z/z           |
|                  | SP1181B | W           | Bay          | A/A           | ov/ov        | KM0/KM0      | sb1/sb1      | C/C         | E/E         | z/z          | z/z           |
|                  | SP1181C | W           | Bay          | A/A           | ov/ov        | KM0/KM0      | sb1/sb1      | C/C         | E/E         | z/z          | z/z           |
|                  | SP1181E | W           | Bay          | A/A           | ov/ov        | KM0/KM0      | sb1/sb1      | C/C         | E/E         | z/z          | z/z           |
|                  | SP1181F | W           | Bay          | A/A           | ov/ov        | KM0/KM0      | sb1/sb1      | C/C         | E/E         | z/z          | z/z           |
| EARLY BRONZE AGE | BER 001 | D(omestic)  | Chestnut     | A/A           | ov/ov        | KM0/KM0      | sb1/sb1      | C/C         | e/e         | z/z          | z/z           |
|                  | TAR 001 | D           | Bay          | A/a           | ov/ov        | KM0/KM0      | sb1/sb1      | C/C         | E/E         | z/z          | z/z           |
|                  | TAR 002 | D           | Chestnut     | a/a           | ov/ov        | KM0/KM0      | sb1/sb1      | C/C         | e/e         | z/z          | z/z           |
|                  | TAR 004 | D           | Bay          | A/A           | ov/ov        | KM0/KM0      | sb1/sb1      | C/C         | E/E         | z/z          | z/z           |
|                  | TAR 005 | D           | Bay Sabino   | A/A           | ov/ov        | KM0/KM0      | SB1/sb1      | C/C         | E/e         | z/z          | z/z           |
|                  | TAR 007 | D           | Black        | a/a           | ov/ov        | KM0/KM0      | sb1/sb1      | C/C         | E/E         | z/z          | z/z           |
|                  | TAR 008 | D           | Bay          | A/a           | ov/ov        | KM0/KM0      | sb1/sb1      | C/C         | E/E         | z/z          | z/z           |
|                  | TAR 010 | D           | Black        | a/a           | ov/ov        | KM0/KM0      | sb1/sb1      | C/C         | E/E         | z/z          | z/z           |
|                  | TAR 011 | D           | Black        | a/a           | ov/ov        | KM0/KM0      | sb1/sb1      | C/C         | E/e         | z/z          | z/z           |
| IRON AGE         | BER 002 | D           | Bay          | A/A           | ov/ov        | KM0/KM0      | sb1/sb1      | C/C         | E/e         | z/z          | z/z           |
|                  | Arz 1-2 | D           | Chestnut     | A/a           | ov/ov        | KM0/KM0      | sb1/sb1      | C/C         | e/e         | z/z          | z/z           |
|                  | Arz 1-3 | D           | Black Silver | a/a           | ov/ov        | KM0/KM0      | sb1/sb1      | C/C         | E/e         | Z/z          | Z/z           |
|                  | Arz 2-1 | D           | Bay          | A/a           | ov/ov        | KM0/KM0      | sb1/sb1      | C/C         | E/E         | z/z          | z/z           |
|                  | Arz 2-2 | D           | Black        | a/a           | ov/ov        | KM0/KM0      | sb1/sb1      | C/C         | E/e         | z/z          | z/z           |
|                  | Arz 2-3 | D           | Chestnut     | A/A           | ov/ov        | KM0/KM0      | sb1/sb1      | C/C         | e/e         | z/z          | z/z           |
|                  | Arz 2-4 | D           | Bay          | A/a           | ov/ov        | KM0/KM0      | sb1/sb1      | C/C         | E/e         | z/z          | z/z           |
|                  | Arz 2-5 | D           | Chestnut     | A/a           | ov/ov        | KM0/KM0      | sb1/sb1      | C/C         | e/e         | z/z          | z/z           |
|                  | Arz 2-6 | D           | Bay          | A/a           | ov/ov        | KM0/KM0      | sb1/sb1      | C/C         | E/e         | z/z          | z/z           |
|                  | Arz 2-7 | D           | Black        | a/a           | ov/ov        | KM0/KM0      | sb1/sb1      | C/C         | E/e         | z/z          | z/z           |
|                  | Arz 2-8 | D           | Buckskin     | A/a           | ov/ov        | KM0/KM0      | sb1/sb1      | C/cr        | E/e         | z/z          | z/z           |

|          |   |                         |     |       |         |         |      |     |     |     |
|----------|---|-------------------------|-----|-------|---------|---------|------|-----|-----|-----|
| Arz 2-9  | D | <b>Buckskin</b>         | A/a | ov/ov | KM0/KM0 | sb1/sb1 | C/cr | E/e | z/z | z/z |
| Arz 2-10 | D | <b>Chestnut Tobiano</b> | A/a | ov/ov | KM0/KM1 | sb1/sb1 | C/C  | e/e | z/z | z/z |
| Arz 2-11 | D | <b>Chestnut</b>         | A/A | ov/ov | KM0/KM0 | sb1/sb1 | C/C  | e/e | z/z | z/z |
| Arz 2-12 | D | <b>Chestnut</b>         | A/a | ov/ov | KM0/KM0 | sb1/sb1 | C/C  | e/e | z/z | z/z |
| Arz 2-13 | D | <b>Chestnut</b>         | A/a | ov/ov | KM0/KM0 | sb1/sb1 | C/C  | e/e | z/z | z/z |
| Arz 2-14 | D | <b>Bay</b>              | A/A | ov/ov | KM0/KM0 | sb1/sb1 | C/C  | E/e | z/z | z/z |
| Bars1A   | D | <b>Bay Tobiano</b>      | A/a | ov/ov | KM0/KM1 | sb1/sb1 | C/C  | E/e | z/z | z/z |
| Bars1B   | D | <b>Bay Tobiano</b>      | A/a | ov/ov | KM0/KM1 | sb1/sb1 | C/C  | E/e | z/z | z/z |
| OKG 001  | D | <b>Chestnut</b>         | A/a | ov/ov | KM0/KM0 | sb1/sb1 | C/C  | e/e | z/z | z/z |
| OKG 002  | D | <b>Bay Tobiano</b>      | A/a | ov/ov | KM0/KM1 | sb1/sb1 | C/C  | E/E | z/z | z/z |
| OKG 003  | D | <b>Buckskin</b>         | A/a | ov/ov | KM0/KM0 | sb1/sb1 | C/cr | E/e | z/z | z/z |

### Eastern Europe

|                         | Sample | Designation | Phenotype    | nuclear Genes |              |              |              |             |             |              |               |
|-------------------------|--------|-------------|--------------|---------------|--------------|--------------|--------------|-------------|-------------|--------------|---------------|
|                         |        |             |              | <i>ASIP</i>   | <i>EDNRB</i> | <i>KIT13</i> | <i>KIT16</i> | <i>MATP</i> | <i>MC1R</i> | <i>SILV9</i> | <i>SILV11</i> |
| GLACIATION - MESOLITHIC | PET1   | W           | <b>Bay</b>   | A/A           | ov/ov        | KM0/KM0      | sb1/sb1      | C/C         | E/E         | z/z          | z/z           |
|                         | PET2   | W           | <b>Bay</b>   | A/A           | ov/ov        | KM0/KM0      | sb1/sb1      | C/C         | E/E         | z/z          | z/z           |
|                         | PET3   | W           | <b>Bay</b>   | A/A           | ov/ov        | KM0/KM0      | sb1/sb1      | C/C         | E/E         | z/z          | z/z           |
|                         | PET5   | W           | <b>Bay</b>   | A/a           | ov/ov        | KM0/KM0      | sb1/sb1      | C/C         | E/E         | z/z          | z/z           |
|                         | PET6   | W           | <b>Bay</b>   | A/A           | ov/ov        | KM0/KM0      | sb1/sb1      | C/C         | E/E         | z/z          | z/z           |
|                         | Kg1    | W           | <b>Bay</b>   | A/A           | ov/ov        | KM0/KM0      | sb1/sb1      | C/C         | E/E         | z/z          | z/z           |
|                         | Kg2    | W           | <b>Bay</b>   | A/A           | ov/ov        | KM0/KM0      | sb1/sb1      | C/C         | E/E         | z/z          | z/z           |
|                         | Kg3    | W           | <b>Bay</b>   | A/A           | ov/ov        | KM0/KM0      | sb1/sb1      | C/C         | E/E         | z/z          | z/z           |
|                         | Kg4    | W           | <b>Bay</b>   | A/A           | ov/ov        | KM0/KM0      | sb1/sb1      | C/C         | E/E         | z/z          | z/z           |
|                         | Kg5    | W           | <b>Bay</b>   | A/A           | ov/ov        | KM0/KM0      | sb1/sb1      | C/C         | E/E         | z/z          | z/z           |
|                         | Spa 1  | W           | <b>Bay</b>   | A/A           | ov/ov        | KM0/KM0      | sb1/sb1      | C/C         | E/E         | z/z          | z/z           |
|                         |        | Pie9        | W            | <b>Black</b>  | a/a          | ov/ov        | KM0/KM0      | sb1/sb1     | C/C         | E/e          | z/z           |
|                         | CAS1   | W           | <b>Black</b> | a/a           | ov/ov        | KM0/KM0      | sb1/sb1      | C/C         | E/E         | z/z          | z/z           |
|                         | VIT2   | W           | <b>Black</b> | a/a           | ov/ov        | KM0/KM0      | sb1/sb1      | C/C         | E/E         | z/z          | z/z           |

|                           |       |    |                 |     |       |         |         |     |     |     |     |
|---------------------------|-------|----|-----------------|-----|-------|---------|---------|-----|-----|-----|-----|
| ENEOLITHIC-<br>COPPER AGE | VIT4  | W  | Black           | a/a | ov/ov | KM0/KM0 | sb1/sb1 | C/C | E/E | z/z | z/z |
|                           | MAY3  | W  | Bay             | A/a | ov/ov | KM0/KM0 | sb1/sb1 | C/C | E/E | z/z | z/z |
|                           | MAY5  | W  | Bay             | A/a | ov/ov | KM0/KM0 | sb1/sb1 | C/C | E/E | z/z | z/z |
|                           | MAY6  | W  | Bay             | A/a | ov/ov | KM0/KM0 | sb1/sb1 | C/C | E/E | z/z | z/z |
|                           | MAY7  | W  | Bay             | A/a | ov/ov | KM0/KM0 | sb1/sb1 | C/C | E/E | z/z | z/z |
|                           | MAY10 | W  | Bay             | A/a | ov/ov | KM0/KM0 | sb1/sb1 | C/C | E/E | z/z | z/z |
|                           | MOL5  | W? | Black           | a/a | ov/ov | KM0/KM0 | sb1/sb1 | C/C | E/E | z/z | z/z |
| BRONZE AGE                | Gar2  | D  | Black           | a/a | ov/ov | KM0/KM0 | sb1/sb1 | C/C | E/e | z/z | z/z |
|                           | Gar3  | D  | Bay             | A/a | ov/ov | KM0/KM0 | sb1/sb1 | C/C | E/E | z/z | z/z |
|                           | Gar4  | D  | Bay             | A/A | ov/ov | KM0/KM0 | sb1/sb1 | C/C | E/E | z/z | z/z |
|                           | GRO11 | D  | Black           | a/a | ov/ov | KM0/KM0 | sb1/sb1 | C/C | E/E | z/z | z/z |
|                           | Shi 1 | D  | Chestnut        | A/A | ov/ov | KM0/KM0 | sb1/sb1 | C/C | e/e | z/z | z/z |
|                           | Lch 1 | D  | Chestnut Sabino | A/a | ov/ov | KM0/KM0 | SB1/sb1 | C/C | e/e | z/z | z/z |
|                           | Lor 1 | D  | Bay             | A/A | ov/ov | KM0/KM0 | sb1/sb1 | C/C | E/E | z/z | z/z |
|                           | Mic1  | D  | Bay Tobiano     | A/a | ov/ov | KM0/KM1 | sb1/sb1 | C/C | E/E | z/z | z/z |
|                           | Mic2  | D  | Chestnut        | A/a | ov/ov | KM0/KM0 | sb1/sb1 | C/C | e/e | z/z | z/z |
|                           | Mic3  | D  | Black           | a/a | ov/ov | KM0/KM0 | sb1/sb1 | C/C | E/E | z/z | z/z |
|                           | Mic4  | D  | Bay             | A/a | ov/ov | KM0/KM0 | sb1/sb1 | C/C | E/E | z/z | z/z |
|                           | Mic5  | D  | Bay Sabino      | A/a | ov/ov | KM0/KM0 | SB1/sb1 | C/C | E/e | z/z | z/z |

## China

|          | Sample | Designation | Phenotype   | nuclear Genes |              |              |              |             |             |              |               |
|----------|--------|-------------|-------------|---------------|--------------|--------------|--------------|-------------|-------------|--------------|---------------|
|          |        |             |             | <i>ASIP</i>   | <i>EDNRB</i> | <i>KIT13</i> | <i>KIT16</i> | <i>MATP</i> | <i>MC1R</i> | <i>SILV9</i> | <i>SILV11</i> |
| IRON AGE | Fen 1  | D           | Bay Tobiano | A/A           | ov/ov        | KM0/KM1      | sb1/sb1      | C/C         | E/E         | z/z          | z/z           |
|          | Fen 2  | D           | Bay         | A/a           | ov/ov        | KM0/KM0      | sb1/sb1      | C/C         | E/e         | z/z          | z/z           |
|          | Fen 3  | D           | Bay         | A/a           | ov/ov        | KM0/KM0      | sb1/sb1      | C/C         | E/E         | z/z          | z/z           |
|          | Fen 4  | D           | Bay         | A/A           | ov/ov        | KM0/KM0      | sb1/sb1      | C/C         | E/E         | z/z          | z/z           |

**Iberian  
Peninsula**

|                          |    |     |          |     |       |         |         |     |     |     |     |
|--------------------------|----|-----|----------|-----|-------|---------|---------|-----|-----|-----|-----|
| MESOLITHIC-<br>NEOLITHIC | 44 | W   | Bay      | A/a | ov/ov | KM0/KM0 | sb1/sb1 | C/C | E/E | z/z | z/z |
|                          | 45 | W   | Bay      | A/a | ov/ov | KM0/KM0 | sb1/sb1 | C/C | E/E | z/z | z/z |
|                          | 3  | W   | Black    | a/a | ov/ov | KM0/KM0 | sb1/sb1 | C/C | E/E | z/z | z/z |
|                          | 31 | W   | Bay      | A/a | ov/ov | KM0/KM0 | sb1/sb1 | C/C | E/E | z/z | z/z |
|                          | 32 | W   | Black    | a/a | ov/ov | KM0/KM0 | sb1/sb1 | C/C | E/E | z/z | z/z |
|                          | 34 | W   | Black    | a/a | ov/ov | KM0/KM0 | sb1/sb1 | C/C | E/E | z/z | z/z |
|                          | 37 | W   | Bay      | A/a | ov/ov | KM0/KM0 | sb1/sb1 | C/C | E/E | z/z | z/z |
|                          | 17 | W   | Black    | a/a | ov/ov | KM0/KM0 | sb1/sb1 | C/C | E/E | z/z | z/z |
| BRONZE<br>AGE            | 39 | D   | Bay      | A/a | ov/ov | KM0/KM0 | sb1/sb1 | C/C | E/E | z/z | z/z |
|                          | 40 | D   | Bay      | A/a | ov/ov | KM0/KM0 | sb1/sb1 | C/C | E/E | z/z | z/z |
|                          | 24 | D   | Bay      | A/a | ov/ov | KM0/KM0 | sb1/sb1 | C/C | E/e | z/z | z/z |
|                          | 22 | D   | Black    | a/a | ov/ov | KM0/KM0 | sb1/sb1 | C/C | E/E | z/z | z/z |
|                          | 25 | D   | Black    | a/a | ov/ov | KM0/KM0 | sb1/sb1 | C/C | E/E | z/z | z/z |
| IRON AGE                 | 4  | W?* | Black    | a/a | ov/ov | KM0/KM0 | sb1/sb1 | C/C | E/E | z/z | z/z |
| MEDIEVAL                 | 29 | D   | Chestnut | a/a | ov/ov | KM0/KM0 | sb1/sb1 | C/C | e/e | z/z | z/z |
|                          | 30 | D   | Chestnut | A/A | ov/ov | KM0/KM0 | sb1/sb1 | C/C | e/e | z/z | z/z |

\* Based on archaeological context.

**Table S6.** Detailed information on the ages of the samples investigated.

**Siberia**

|                  | Sample  | Geographical location | Excavation                             | Stratigraphic date | Age <sup>14</sup> C | Calibrated date | Lab. No. | Details |
|------------------|---------|-----------------------|----------------------------------------|--------------------|---------------------|-----------------|----------|---------|
| PLEISTOCENE      | SP1181A | North Siberia         | Maliy Lyakhovsky Isl.                  | Pleistocene        |                     |                 |          |         |
|                  | SP1181B | North Siberia         | Bol'shoy Lyakhovsky Isl.               | Pleistocene        |                     |                 |          |         |
|                  | SP1181C | North Siberia         | Bol'shoy Lyakhovsky Isl.               | Pleistocene        |                     |                 |          |         |
|                  | SP1181E | Siberia               | Oyagoskiy Yar, Kondrat'ev R.,<br>mouth | Pleistocene        |                     |                 |          |         |
|                  | SP1181F | Siberia               | Kotel'niy Isl., Anisiy Cape            | Pleistocene        |                     |                 |          |         |
| EARLY BRONZE AGE | BER 001 | Siberia (Altai)       | Denisova-Pescera                       | 3000BC             |                     |                 |          |         |
|                  | TAR 001 | West Siberia          | Tartas1                                | 2500-3000BC        |                     |                 |          |         |
|                  | TAR 002 | West Siberia          | Tartas1                                | 2500-3000BC        |                     |                 |          |         |
|                  | TAR 004 | West Siberia          | Tartas1                                | 2500-3000BC        |                     |                 |          |         |
|                  | TAR 005 | West Siberia          | Tartas1                                | 2500-3000BC        |                     |                 |          |         |
|                  | TAR 007 | West Siberia          | Tartas1                                | 2500-3000BC        |                     |                 |          |         |
|                  | TAR 008 | West Siberia          | Tartas1                                | 2500-3000BC        |                     |                 |          |         |
|                  | TAR 010 | West Siberia          | Tartas1                                | 2500-3000BC        |                     |                 |          |         |
|                  | TAR 011 | West Siberia          | Tartas1                                | 2500-3000BC        |                     |                 |          |         |
| IRON AGE         | BER 002 | Siberia (Altai)       | Om-1                                   | 900BC              |                     |                 |          |         |
|                  | Arz 1-2 | South Siberia (Tuva)  | Arzan1                                 | 800BC              |                     |                 |          |         |
|                  | Arz 1-3 | South Siberia (Tuva)  | Arzan1                                 | 800BC              |                     |                 |          |         |
|                  | Arz 2-1 | South Siberia (Tuva)  | Arzan2                                 | 619-608 BC         |                     |                 |          |         |
|                  | Arz 2-2 | South Siberia (Tuva)  | Arzan2                                 | 619-608 BC         |                     |                 |          |         |
|                  | Arz 2-3 | South Siberia (Tuva)  | Arzan2                                 | 619-608 BC         |                     |                 |          |         |
|                  | Arz 2-4 | South Siberia (Tuva)  | Arzan2                                 | 619-608 BC         |                     |                 |          |         |
|                  | Arz 2-5 | South Siberia (Tuva)  | Arzan2                                 | 619-608 BC         |                     |                 |          |         |
|                  | Arz 2-6 | South Siberia (Tuva)  | Arzan2                                 | 619-608 BC         |                     |                 |          |         |

|          |                      |                   |                 |              |                 |           |              |
|----------|----------------------|-------------------|-----------------|--------------|-----------------|-----------|--------------|
| Arz 2-7  | South Siberia (Tuva) | Arzan2            | 619-608 BC      |              |                 |           |              |
| Arz 2-8  | South Siberia (Tuva) | Arzan2            | 619-608 BC      |              |                 |           |              |
| Arz 2-9  | South Siberia (Tuva) | Arzan2            | 619-608 BC      |              |                 |           |              |
| Arz 2-10 | South Siberia (Tuva) | Arzan2            | 619-608 BC      |              |                 |           |              |
| Arz 2-11 | South Siberia (Tuva) | Arzan2            | 619-608 BC      |              |                 |           |              |
| Arz 2-12 | South Siberia (Tuva) | Arzan2            | 619-608 BC      |              |                 |           |              |
| Arz 2-13 | South Siberia (Tuva) | Arzan2            | 619-608 BC      |              |                 |           |              |
| Arz 2-14 | South Siberia (Tuva) | Arzan2            | 619-608 BC      |              |                 |           |              |
| Bars1A   | South Siberia (Tuva) | Barsucij Log      |                 | 2170 ± 30 BP | cal. 370-150 BC | Poz-22611 | 3.3%N 11.5%C |
| Bars1B   | South Siberia (Tuva) | Barsucij Log      | cal. 400-200 BC |              |                 |           |              |
| OKG 001  | Siberia (Mongolia)   | Olon-Kurin-Gol 10 | 400-300 BC      |              |                 |           |              |
| OKG 002  | Siberia (Mongolia)   | Olon-Kurin-Gol 10 | 400-300 BC      |              |                 |           |              |
| OKG 003  | Siberia (Mongolia)   | Olon-Kurin-Gol 10 | 400-300 BC      |              |                 |           |              |

## East Europe

|                 | Sample | Geographical location | Excavation | Stratigraphic date | Age <sup>14</sup> C | Calibrated date | Lab. No. | Details |
|-----------------|--------|-----------------------|------------|--------------------|---------------------|-----------------|----------|---------|
| LATE GLACIATION | PET1   | South Germany         | Petersfels | 14000-11000 BC     |                     |                 |          |         |
|                 | PET2   | South Germany         | Petersfels | 14000-11000 BC     |                     |                 |          |         |
|                 | PET3   | South Germany         | Petersfels | 14000-11000 BC     |                     |                 |          |         |
|                 | PET5   | South Germany         | Petersfels | 14000-11000 BC     |                     |                 |          |         |
|                 | PET6   | South Germany         | Petersfels | 14000-11000 BC     |                     |                 |          |         |
|                 | Kg1    | Germany (Thuringia)   | Kniegrotte | 15000-14000 BC     |                     |                 |          |         |
|                 | Kg2    | Germany (Thuringia)   | Kniegrotte | 15000-14000 BC     |                     |                 |          |         |
|                 | Kg3    | Germany (Thuringia)   | Kniegrotte | 15000-14000 BC     |                     |                 |          |         |
|                 | Kg4    | Germany (Thuringia)   | Kniegrotte | 15000-14000 BC     |                     |                 |          |         |
|                 | Kg5    | Germany (Thuringia)   | Kniegrotte | 15000-14000 BC     |                     |                 |          |         |



|                       |         |                               |                   |              |              |                      |           |                          |
|-----------------------|---------|-------------------------------|-------------------|--------------|--------------|----------------------|-----------|--------------------------|
| ENEOLITHIC-COPPER AGE | Spa 1   | Ukraine (Peninsula<br>Crimea) | Span-Koba         |              |              | cal. 9390-9210<br>BC |           |                          |
|                       | Pie9    | Romania                       | Pietrele          | 4300 BC      |              |                      |           |                          |
|                       | CAS1    | Romania                       | Cascioarele       |              | 4820 ± 40 BP | cal. 3700-3380<br>BC | Poz-24925 | 1.0%N 7.6%C<br>carbonate |
|                       | VIT2    | Romania                       | Vitanesti         |              | 5400 ± 40 BP | cal. 4350-4220<br>BC | Poz-24899 | 1.5%N 6.0%C              |
|                       | VIT4    | Romania                       | Vitanesti         |              | 5430 ± 40 BP | cal. 4360-4220<br>BC | Poz-24900 | 1.7%N 6.5%C              |
|                       | MAY3    | Ukraine                       | Mayaki            |              | 4745 ± 35 BP | cal. 3640-3490<br>BC | Poz-24926 | 0.6%N 2.8%C<br>carbonate |
|                       | MAY5    | Ukraine                       | Mayaki            |              | 4550 ± 35 BP | cal. 3250-3100<br>BC | Poz-24826 | 2.4%N 9.8%C              |
|                       | MAY6    | Ukraine                       | Mayaki            |              | 4605 ± 35 BP | cal. 3520-3330<br>BC | Poz-24849 | 1.6%N 6.7%C              |
|                       | MAY7    | Ukraine                       | Mayaki            |              | 4640 ± 35 BP | cal. 3520-3380<br>BC | Poz-24850 | 2.6%N 10.4%C             |
|                       | MAY10   | Ukraine                       | Mayaki            |              | 4770 ± 40 BP | cal. 3650-3500<br>BC | Poz-24927 | 0.5%N 3.4%C<br>carbonate |
| MOL5                  | Ukraine | Molyukhov Bugor               | cal. 3720-3630 BC |              |              |                      |           |                          |
| BRONZE AGE            | Gar2    | Romania                       | Garbovat          | 1500-1000 BC |              |                      |           |                          |
|                       | Gar3    | Romania                       | Garbovat          | 1500-1000 BC |              |                      |           |                          |
|                       | Gar4    | Romania                       | Garbovat          | 1500-1000 BC |              |                      |           |                          |
|                       | GRO11   | Germany                       | Großobringen      | 3000-2500 BC |              |                      |           |                          |
|                       | Shi 1   | Armenia                       | Shirakavan        |              | 2670 ± 30 BP | cal. 895-795 BC      | Poz-22615 | 1.5%N 5.5%C              |
|                       | Lch 1   | Armenia                       | Lchashen          |              | 3050 ± 30 BP | cal. 1410-1250<br>BC | Poz-22613 | 3.7%N 12.4%C             |
|                       | Lor 1   | North Armenia                 | Lori-Berd         |              | 3525 ± 35 BP | cal. 1950-1750<br>BC | Poz-22701 | 1.1%N 4.6%C              |
|                       | Mic1    | Moldova                       | Miciurin          | 1500-1000 BC |              |                      |           |                          |
|                       | Mic2    | Moldova                       | Miciurin          | 1500-1000 BC |              |                      |           |                          |
|                       | Mic3    | Moldova                       | Miciurin          | 1500-1000 BC |              |                      |           |                          |
|                       | Mic4    | Moldova                       | Miciurin          | 1500-1000 BC |              |                      |           |                          |
| Mic5                  | Moldova | Miciurin                      | 1500-1000 BC      |              |              |                      |           |                          |

## China

|          | Sample | Geographical location | Excavation | Stratigraphic date | Age <sup>14</sup> C | Calibrated date | Lab. No.  | Detail       |
|----------|--------|-----------------------|------------|--------------------|---------------------|-----------------|-----------|--------------|
| IRON AGE | Fen 1  | China (Qinghai)       | Fengtai    |                    | 2695 ± 30 BP        | cal. 905-800 BC | Poz-22612 | 3.4%N 11.0%C |
|          | Fen 2  | China (Qinghai)       | Fengtai    | 905-800 BC         |                     |                 |           |              |
|          | Fen 3  | China (Qinghai)       | Fengtai    | 905-800 BC         |                     |                 |           |              |
|          | Fen 4  | China (Qinghai)       | Fengtai    | 905-800 BC         |                     |                 |           |              |

## Iberian Peninsula

|                      | Sample     | Geographical location     | Excavation                       | Stratigraphic date | Age <sup>14</sup> C | Calibrated date   | Lab. No.  | Detail       |
|----------------------|------------|---------------------------|----------------------------------|--------------------|---------------------|-------------------|-----------|--------------|
| MESOLITHIC-NEOLITHIC | 44         | Iberian Peninsula (Spain) | Atxoste                          | 5500- 4950 BC      |                     |                   |           |              |
|                      | 45         | Iberian Peninsula (Spain) | Atxoste                          | 5500- 4950 BC      |                     |                   |           |              |
|                      | 3          | Iberian Peninsula (Spain) | Cueva Fosca - Valencia-Cartellon | cal. 5200-4900 BC  |                     |                   |           |              |
|                      | 31         | Iberian Peninsula (Spain) | Cueva Fosca - Valencia-Cartellon |                    | 6100 ± 40 BP        | cal. 5210-4910 BC | Poz-24720 | 3.5%N 15.4%C |
|                      | 32         | Iberian Peninsula (Spain) | Cueva Fosca - Valencia-Cartellon |                    | 6135 ± 35 BP        | cal. 5220-4980 BC | Poz-24743 | 3.4%N 17.2%C |
|                      | 34         | Iberian Peninsula (Spain) | Cueva Fosca - Valencia-Cartellon | cal. 5200-4900 BC  |                     |                   |           |              |
|                      | 37         | Iberian Peninsula (Spain) | Cueva Fosca - Valencia-Cartellon |                    | 6100 ± 40 BP        | cal. 5210-4910 BC | Poz-24745 | 2.6%N 11.9%C |
|                      | 17         | Iberian Peninsula (Spain) | Cueva De La Vaquera - Segovia    |                    | 6110 ± 40 BP        | cal. 5210-4940 BC | Poz-24721 | 2.7%N 13.9%C |
|                      | BRONZE AGE | 39                        | Iberian Peninsula (Spain)        | El Acequion        | 2200 BC - 800 AD    |                   |           |              |
| 40                   |            | Iberian Peninsula (Spain) | El Acequion                      | 2200 BC - 800 AD   |                     |                   |           |              |
| 24                   |            | Iberian Peninsula (Spain) | Cueva Rubia - Valmayor/Madrid    | cal. 2880-2570BC   |                     |                   |           |              |
| 22                   |            | Iberian Peninsula (Spain) | Cueva Rubia - Valmayor/Madrid    | cal. 2880-2570BC   |                     |                   |           |              |
| 25                   |            | Iberian Peninsula (Spain) | Cueva Rubia - Valmayor/Madrid    | cal. 2880-2570BC   |                     |                   |           |              |

|          |    |                           |                                |               |              |                 |           |             |
|----------|----|---------------------------|--------------------------------|---------------|--------------|-----------------|-----------|-------------|
| IRON AGE | 4  | Iberian Peninsula (Spain) | Soto de Medinilla – Valladolid | 800 BC - 6 AD |              |                 |           |             |
| MEDIEVAL | 29 | Iberian Peninsula (Spain) | Mucientes - Valladolid         |               | 1275 ± 25 BP | cal. 660-780 AD | Poz-24740 | 1.2%N 6.9%C |
|          | 30 | Iberian Peninsula (Spain) | Mucientes - Valladolid         |               | 1230 ± 30 BP | cal. 680-890AD  | Poz-24739 | 3.4%N 15%C  |

**Table S7.** Upper bound of the frequency  $f_{5\%}$  a colour allele could have had in the horse population prior to domestication having a chance to be missed of  $p \leq 0.05$  ( $n$  = number of alleles).

| Population                            | n         | $f_{5\%}$   |
|---------------------------------------|-----------|-------------|
| Siberia                               | 10        | 0.26        |
| East Europe                           | 42        | 0.07        |
| Iberia                                | 16        | 0.15        |
| Siberia + East Europe                 | 52        | 0.06        |
| <b>Siberia + East Europe + Iberia</b> | <b>68</b> | <b>0.04</b> |

**Table S8.** Maximum likelihood estimates of the selection coefficient for each of the loci. The results were obtained using Bollback et al's method (*S11*), excluding the Pleistocene samples. To get the 95% confidence interval we used the profile likelihood. For ASIP and MC1R loci the selection coefficient is significantly different than 0. For the other loci, the data is compatible with  $s=0$ . Therefore, the observed data are difficult to explain by genetic drift alone under a standard neutral model (for review see *S14*).

Note that we had no power to estimate the effective population size. Indeed, the confidence interval for the effective population size spans all the values of the grid we used to compute the likelihood, that is 10,000 to 100,000. This is not surprising since Bollback et al. (*S11*) noted that their method has little power to co-estimate the effective population size and the selection coefficient.

| Gene   | Selection coefficient, maximum likelihood estimate and 95% confidence interval |
|--------|--------------------------------------------------------------------------------|
| ASIP   | 0.0007 (0.0001, 0.0015)                                                        |
| KIT13  | 0.0003 (-0.0007, 0.007)                                                        |
| KIT16  | -0.0003 (-0.0013, 0.0011)                                                      |
| MATP   | 0.000 (-0.001, 0.001)                                                          |
| MC1R   | 0.0019 (0.0007, 0.0035)                                                        |
| SILV19 | -0.0003 (-0.0015, 0.0013)                                                      |

### Supplementary references

- S1. N. Rohland, M. Hofreiter, *Nature Protocols* **2**, 1756 (2007).
- S2. J. Krause *et al.*, *Nature* **439**, 724 (Feb 9, 2006).
- S3. H. Römler *et al.*, *Nat. Protocols* **1**, 720 (2006).
- S4. S. A. Brooks, E. Bailey, *Mamm Genome* **16**, 893 (Nov, 2005).
- S5. S. A. Brooks, R. B. Terry, E. Bailey, *Anim Genet* **33**, 301 (Aug, 2002).
- S6. E. Brunberg *et al.*, *BMC Genet* **7**, 46 (2006).
- S7. D. Mariat, S. Taourit, G. Guerin, *Genet Sel Evol* **35**, 119 (Jan-Feb, 2003).
- S8. L. Marklund, M. J. Moller, K. Sandberg, L. Andersson, *Mamm Genome* **7**, 895 (Dec, 1996).

- S9. S. Rieder, S. Taourit, D. Mariat, B. Langlois, G. Guerin, *Mamm Genome* **12**, 450 (Jun, 2001).
- S10. P. Gagneux, C. Boesch, D. S. Woodruff, *Mol Ecol* **6**, 861 (Sep, 1997).
- S11. J. P. Bollback, T. L. York, R. Nielsen, *Genetics* **179**, 497 (May, 2008).
- S12. M. Reissmann, J. Bierwolf, G. Brockmann, *Anim Genet* **38**, 1 (2007).
- S13. E. M. Santschi, A. K. Purdy, S. J. Valberg, P. D. Vrotsos, H. Kaese, J. R. Mickelson *Mamm Genome* **9**, 306 (1998).
- S14. N. A. Rosenberg, M. Nordborg *Nature Reviews Genetics* **3**, 380 (May 2002).
